# Supplementary material for: AZO Nanoparticles-Decorated CNTs for UV Light Sensing: A Structural, Chemical, and Electro-Optical Investigation
Source: MDPI journal article supplement (doi:10.3390/nano13010215), 2023-01-03
Supplement: s1 [file s1]

## Supplementary Materials

# AZO Nanoparticles-Decorated CNTs for UV Light Sensing: A Structural, Chemical, and Electro-Optical Investigation

Simona Filice <sup>1,†</sup>, Stefano Boscarino <sup>2,3,\*</sup>, Mario Scuderi <sup>1</sup>, Sebania Libertino <sup>1</sup>, Clelia Galati <sup>4</sup>, Antonio Terrasi <sup>2,3</sup> and Silvia Scalese <sup>1,\*</sup>

<sup>1</sup> Consiglio Nazionale delle Ricerche—Istituto per la Microelettronica e Microsistemi (CNR-IMM), Ottava Strada n.5, I-95121 Catania, Italy

<sup>2</sup> Dipartimento di Fisica e Astronomia, Università degli Studi di Catania, via S. Sofia 64, I-95123 Catania, Italy

<sup>3</sup> Consiglio Nazionale delle Ricerche—Istituto per la Microelettronica e Microsistemi (CNR-IMM), sede di Catania—Università, via S. Sofia 64, I-95123 Catania, Italy

<sup>4</sup> STMicroelectronics, Stradale Primosole 5, I-95121 Catania, Italy

\* Correspondence: stefano.boscarino@dfa.unict.it (S.B.); silvia.scalese@imm.cnr.it (S.S.)

† These authors contributed equally to this work.

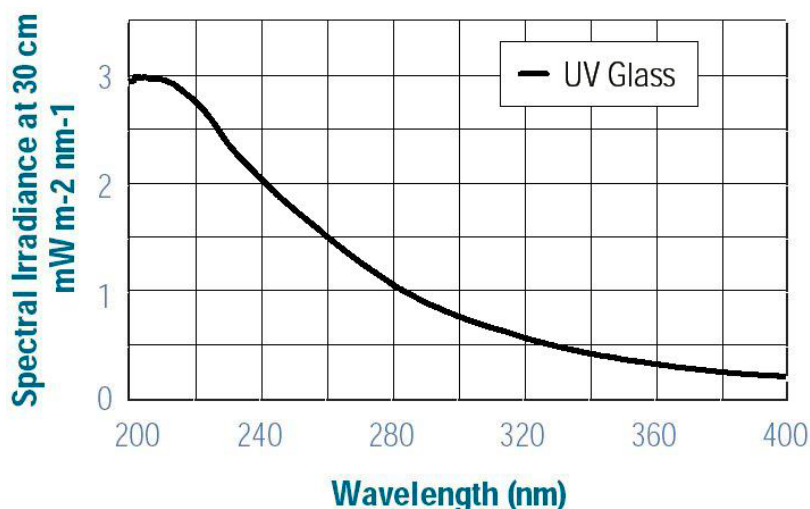

**Figure S1:** Spectrum of the light source (ASBN-D130 Deuterium Light Source by Spectral Products (Putnam, CT, USA)).

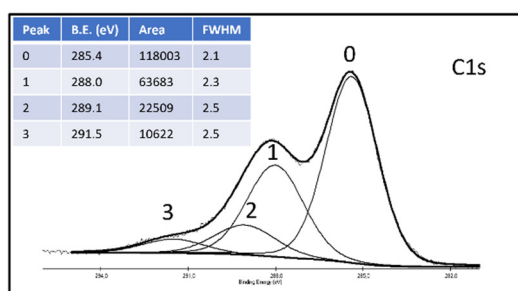

(a)

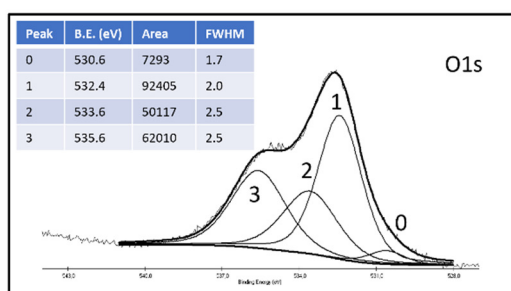

(b)

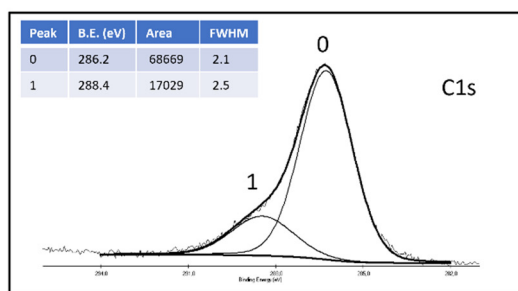

(c)

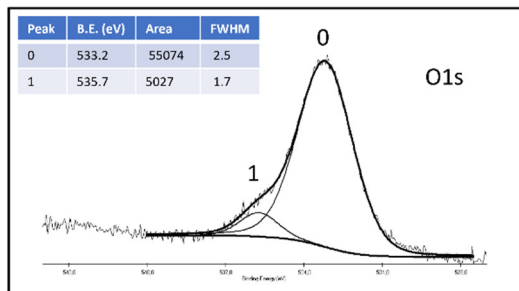

(d)

**Figure S2:** Deconvolution of C1s, O1s XPS peaks for AZO-NPs sample (a, b) and for AZO-CNTs sample (c, d).

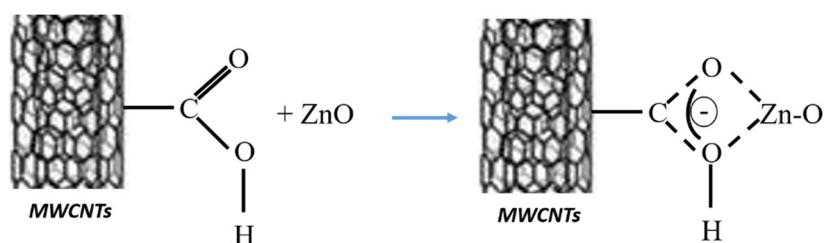

**Figure S3:** Scheme of ZnO coordination on carboxylic functionalization on CNTs.
